# Supplementary material for: Silver citrate engineered NiCo 2 S 4 /MOF-derived oxide@carbon frameworks for high-energy hybrid supercapacitors
Source: Royal Society of Chemistry journal article supplement (doi:10.1039/d5ra09122e), 2026-01-01
Supplement: d5ra09122e1.pdf [file d5ra09122e1.pdf]

## Supporting Information

### **Silver Citrate Engineered NiCo<sub>2</sub>S<sub>4</sub>/MOF-Derived Oxide@Carbon Frameworks for High-Energy Hybrid Supercapacitors**

Areeba Sajid<sup>a,1</sup>, Mohsin Ali Marwat<sup>a,1,\*</sup>, Hamza Mohsin<sup>a</sup>, Syed Shaheen Shah<sup>b</sup>, Muhammad Arqam Karim<sup>a</sup>, Muhammad Razmzan Abdul Karim<sup>a</sup>, Muhammad Tariq<sup>a</sup>, Zuhair Ehsan<sup>a</sup>, Anusha Arif<sup>a</sup>, Esha Ghazanfar<sup>a</sup>

<sup>a</sup> Department of Materials Science and Engineering, Ghulam Ishaq Khan (GIK) Institute of Engineering Sciences and Technology, Topi 23640, Pakistan

<sup>b</sup> Department of Material Chemistry, Graduate School of Engineering, Kyoto University, Nishikyo-ku, Kyoto 615-8520, Japan

<sup>1</sup> These authors contributed equally to this work.

**\*Correspondence:** Mohsin Ali Marwat; E-mail: mohsin.ali@giki.edu.pk; Tel: +92-938-281026; Fax: +92-938-281032.

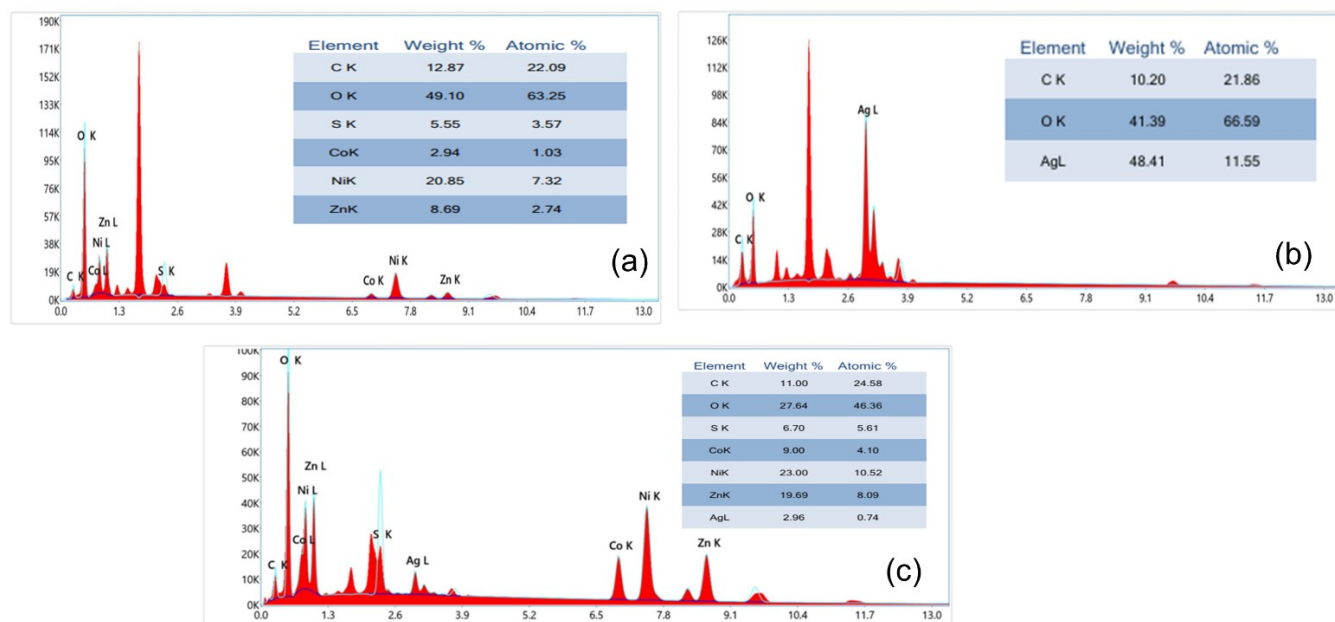

Figure S1: EDX spectra of sample (a) A1 (b) A2 and (c) A5 confirming the presence of constituent elements.

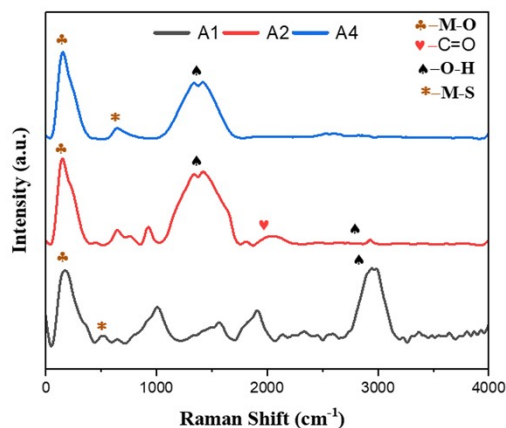

Figure S2: Raman spectra of A1 (calcined MOF-derived mixed metal oxides coupled with  $\text{NiCo}_2\text{S}_4$ ), A2 (silver-citrate), and A3 (A1-A2 composite), highlighting metal-oxygen/metal-sulfur bonds vibrations in the low-wavenumber region and organic functional group bands at higher Raman shifts, confirming successful composite formation.

Raman spectroscopy using Model: BWS415-532S with Cu K $\alpha$  radiation 1.54 Å was employed to investigate the bonding nature and structural evolution of the samples. Figure 1 shows the A1 (pristine  $\text{NiCoZn}$  oxide/ $\text{NiCo}_2\text{S}_4$ ) sample exhibits strong Raman bands in the 400-700  $\text{cm}^{-1}$  region, corresponding to metal-oxygen (Ni-O, Co-O, and Zn-O) vibrations, along with additional features attributed to metal-sulfur bonds, confirming the formation of mixed metal oxides integrated with  $\text{NiCo}_2\text{S}_4$ . In contrast, A2 (silver-citrate) shows dominant Raman bands associated with C=O, O-H, and C-H vibrations, characteristic of citrate ligands. The A4 (60 wt.%  $\text{NiCo}_2\text{S}_4$ @calcined-MOFs / 40 wt.% Ag-citrate) sample displays combined Raman features of both A1 and A2, indicating successful integration of the oxide-sulfide framework with Ag citrate. This synergistic integration is expected to enhance charge transfer and electrochemical performance.
